# Supplementary material for: Prenatal Exposure to an EDC Mixture, NeuroMix: Effects on Brain, Behavior, and Stress Responsiveness in Rats
Source: MDPI journal article supplement (doi:10.3390/toxics10030122), 2022-03-03
Supplement: s1 [file s1]

# Supplementary Materials: Prenatal Exposure to an EDC Mixture, NeuroMix: Effects on Brain, Behavior, and Stress Responsiveness in Rats

Andrea C. Gore, Tatum Moore, Matthew J. Groom and Lindsay M. Thompson

**Table S1.** Statistical analyses.

| Development and Physiology |           | Females |                 |                                           |                                 |
|----------------------------|-----------|---------|-----------------|-------------------------------------------|---------------------------------|
|                            |           | Test    | <i>p</i> -value | $\eta^2$ for ANOVA<br>$\epsilon^2$ for KW | F(df) for ANOVA $\chi^2$ for KW |
| P1 Body Weight             | Treatment | ANOVA   | 0.070           | 0.071                                     | F (1, 45) =1.859                |
| P14 Body Weight            | Treatment | ANOVA   | 0.828           | 13.120                                    | F (1, 94) = 0.047               |
|                            | Stress    |         | 0.124           | 664.900                                   | F (1, 94) = 2.414               |
|                            | TxS       |         | 0.344           | 249.200                                   | F (1, 94) = 0.905               |
| P1 AGI                     | Treatment | ANOVA   | 0.030           | 0.101                                     | F (1, 45) =2.245                |
| P14 AGI                    | Treatment | ANOVA   | 0.214           | 0.034                                     | F (1, 45) =1.262                |

  

| Development and Physiology |           | Males |                 |                                           |                                 |
|----------------------------|-----------|-------|-----------------|-------------------------------------------|---------------------------------|
|                            |           | Test  | <i>p</i> -value | $\eta^2$ for ANOVA<br>$\epsilon^2$ for KW | F(df) for ANOVA $\chi^2$ for KW |
| P1 Body Weight             | Treatment | ANOVA | 0.001           | 0.189                                     | F (1, 48) = 3.347               |
| P84 Body Weight            | Treatment | ANOVA | 0.077           | 2709.000                                  | F (1, 97) = 3.190               |
|                            | Stress    |       | 0.133           | 1950.000                                  | F (1, 97) = 2.296               |
|                            | TxS       |       | 0.508           | 374.400                                   | F (1, 97) = 0.441               |
| P1 AGI                     | Treatment | ANOVA | 0.207           | 0.033                                     | F (1, 48) =1.280                |
| P14 AGI                    | Treatment | ANOVA | 0.000           | 0.371                                     | F (1, 48) =5.323                |

  

| Light Dark Box          |           | Females |                 |                                           |                                 |
|-------------------------|-----------|---------|-----------------|-------------------------------------------|---------------------------------|
|                         |           | Test    | <i>p</i> -value | $\eta^2$ for ANOVA<br>$\epsilon^2$ for KW | F(df) for ANOVA $\chi^2$ for KW |
| Distance                | Treatment | ANOVA   | 0.373           | 0.008                                     | F(1,94)=0.801                   |
|                         | Stress    |         | 0.853           | 0.000                                     | F(1,94)=0.035                   |
|                         | TxS       |         | 0.754           | 0.001                                     | F(1,94)=0.099                   |
| Freezing Episodes       | Treatment | KW      | 0.806           | 0.001                                     | $\chi^2(1)=0.06$                |
|                         | Stress    |         | 0.095           | 0.029                                     | $\chi^2(1)=2.787$               |
| Time Freezing           | Treatment | KW      | 0.601           | 0.003                                     | $\chi^2(1)=0.274$               |
|                         | Stress    |         | 0.066           | 0.035                                     | $\chi^2(1)=3.386$               |
| Light Time              | Treatment | KW      | 0.029           | 0.049                                     | $\chi^2(1)=4.776$               |
|                         | Stress    |         | 0.708           | 0.001                                     | $\chi^2(1)=0.14$                |
| Light Freezing Episodes | Treatment | KW      | 0.037           | 0.045                                     | $\chi^2(1)=4.331$               |
|                         | Stress    |         | 0.316           | 0.010                                     | $\chi^2(1)=1.004$               |
| Light Freezing Time     | Treatment | KW      | 0.177           | 0.019                                     | $\chi^2(1)=1.82$                |
|                         | Stress    |         | 0.399           | 0.007                                     | $\chi^2(1)=0.71$                |
| Dark Time               | Treatment | KW      | 0.028           | 0.050                                     | $\chi^2(1)=4.807$               |
|                         | Stress    |         | 0.708           | 0.001                                     | $\chi^2(1)=0.14$                |
| Dark Freezing Episodes  | Treatment | ANOVA   | 0.379           | 0.008                                     | F(1,94)=0.780                   |
|                         | Stress    |         | 0.123           | 0.025                                     | F(1,94)=2.420                   |
|                         | TxS       |         | 0.361           | 0.009                                     | F(1,94)=0.844                   |
| Dark Freezing Time      | Treatment | KW      | 0.284           | 0.012                                     | $\chi^2(1)=1.148$               |
|                         | Stress    |         | 0.211           | 0.016                                     | $\chi^2(1)=1.561$               |

|               |           |       |       |       |                   |
|---------------|-----------|-------|-------|-------|-------------------|
| Speed         | Treatment | ANOVA | 0.369 | 0.009 | F(1,94)=0.814     |
|               | Stress    |       | 0.843 | 0.000 | F(1,94)=0.039     |
|               | TxS       |       | 0.740 | 0.001 | F(1,94)=0.111     |
| Line Crossing | Treatment | KW    | 0.643 | 0.002 | $\chi^2(1)=0.215$ |
|               | Stress    |       | 0.977 | 0.000 | $\chi^2(1)=0.001$ |

| Light Dark Box          |           | Males |         |                                           |                                 |
|-------------------------|-----------|-------|---------|-------------------------------------------|---------------------------------|
|                         |           | Test  | p-value | $\eta^2$ for ANOVA<br>$\epsilon^2$ for KW | F(df) for ANOVA $\chi^2$ for KW |
| Distance                | Treatment | ANOVA | 0.210   | 0.016                                     | F(1,97)=1.596                   |
|                         | Stress    |       | 0.752   | 0.001                                     | F(1,97)=0.101                   |
|                         | TxS       |       | 0.736   | 0.001                                     | F(1,97)=0.114                   |
| Freezing Episodes       | Treatment | KW    | 0.187   | 0.017                                     | $\chi^2(1)=1.741$               |
|                         | Stress    |       | 0.067   | 0.033                                     | $\chi^2(1)=3.344$               |
| Time Freezing           | Treatment | KW    | 0.372   | 0.008                                     | $\chi^2(1)=0.798$               |
|                         | Stress    |       | 0.012   | 0.063                                     | $\chi^2(1)=6.267$               |
| Light Time              | Treatment | KW    | 0.421   | 0.006                                     | $\chi^2(1)=0.648$               |
|                         | Stress    |       | 0.347   | 0.009                                     | $\chi^2(1)=0.885$               |
| Light Freezing Episodes | Treatment | KW    | 0.723   | 0.001                                     | $\chi^2(1)=0.126$               |
|                         | Stress    |       | 0.986   | 0.000                                     | $\chi^2(1)=0.000$               |
| Light Freezing Time     | Treatment | KW    | 0.892   | 0.000                                     | $\chi^2(1)=0.019$               |
|                         | Stress    |       | 0.937   | 0.000                                     | $\chi^2(1)=0.006$               |
| Dark Time               | Treatment | KW    | 0.455   | 0.006                                     | $\chi^2(1)=0.559$               |
|                         | Stress    |       | 0.313   | 0.010                                     | $\chi^2(1)=1.019$               |
| Dark Freezing Episodes  | Treatment | KW    | 0.229   | 0.014                                     | $\chi^2(1)=1.449$               |
|                         | Stress    |       | 0.189   | 0.017                                     | $\chi^2(1)=1.724$               |
| Dark Freezing Time      | Treatment | KW    | 0.557   | 0.003                                     | $\chi^2(1)=0.346$               |
|                         | Stress    |       | 0.035   | 0.044                                     | $\chi^2(1)=4.433$               |
| Speed                   | Treatment | ANOVA | 0.224   | 0.015                                     | F(1,97)=1.500                   |
|                         | Stress    |       | 0.748   | 0.001                                     | F(1,97)=0.104                   |
|                         | TxS       |       | 0.725   | 0.001                                     | F(1,97)=0.125                   |
| Line Crossing           | Treatment | KW    | 0.349   | 0.009                                     | $\chi^2(1)=0.876$               |
|                         | Stress    |       | 0.051   | 0.038                                     | $\chi^2(1)=3.803$               |

| Sociability              |           | Females |         |                                           |                                 |
|--------------------------|-----------|---------|---------|-------------------------------------------|---------------------------------|
|                          |           | Test    | p-value | $\eta^2$ for ANOVA<br>$\epsilon^2$ for KW | F(df) for ANOVA $\chi^2$ for KW |
| Distance Traveled        | Treatment | ANOVA   | 0.038   | 0.046                                     | F(1,92)=4.441                   |
|                          | Stress    |         | 0.541   | 0.004                                     | F(1,92)=0.376                   |
|                          | TxS       |         | 0.769   | 0.001                                     | F(1,92)=0.087                   |
| Time in Center           | Treatment | KW      | 0.015   | 0.062                                     | $\chi^2(1)=5.875$               |
|                          | Stress    |         | 0.362   | 0.009                                     | $\chi^2(1)=0.830$               |
| Time Near Social         | Treatment | KW      | 0.059   | 0.037                                     | $\chi^2(1)=3.553$               |
|                          | Stress    |         | 0.725   | 0.001                                     | $\chi^2(1)=0.124$               |
| Avg Visit Time to Social | Treatment | KW      | 0.029   | 0.050                                     | $\chi^2(1)=4.794$               |
|                          | Stress    |         | 0.956   | 0.000                                     | $\chi^2(1)=0.003$               |
| Time Near Empty          | Treatment | KW      | 0.214   | 0.016                                     | $\chi^2(1)=1.545$               |
|                          | Stress    |         | 0.468   | 0.006                                     | $\chi^2(1)=0.527$               |
| Avg Visit Time to Empty  | Treatment | KW      | 0.912   | 0.000                                     | $\chi^2(1)=0.012$               |
|                          | Stress    |         | 0.662   | 0.002                                     | $\chi^2(1)=0.191$               |
| Social Pref Score        | Treatment | KW      | 0.061   | 0.037                                     | $\chi^2(1)=3.498$               |
|                          | Stress    |         | 0.706   | 0.002                                     | $\chi^2(1)=0.143$               |

| Sociability |  | Males |  |  |  |
|-------------|--|-------|--|--|--|
|-------------|--|-------|--|--|--|

|                          |                  | Test  | <i>p</i> -value | $\eta^2$ for ANOVA<br>$\epsilon^2$ for KW | F(df) for ANOVA $\chi^2$ for<br>KW |
|--------------------------|------------------|-------|-----------------|-------------------------------------------|------------------------------------|
| Distance Traveled        | Treatment        | KW    | 0.373           | 0.008                                     | $\chi^2(1)=0.792$                  |
|                          | Stress           |       | 0.096           | 0.028                                     | $\chi^2(1)=2.763$                  |
| Time in Center           | Treatment        | KW    | 0.216           | 0.015                                     | $\chi^2(1)=1.534$                  |
|                          | Stress           |       | 0.463           | 0.005                                     | $\chi^2(1)=0.538$                  |
| Time Near Social         | Treatment        | ANOVA | 0.781           | 0.001                                     | F(1,96)=0.078                      |
|                          | Stress           |       | 0.564           | 0.004                                     | F(1,96)=0.336                      |
|                          | Treatment:Stress |       | 0.516           | 0.004                                     | F(1,96)=0.426                      |
| Avg Visit Time to Social | Treatment        | KW    | 0.532           | 0.004                                     | $\chi^2(1)=0.390$                  |
|                          | Stress           |       | 0.021           | 0.053                                     | $\chi^2(1)=5.296$                  |
| Time Near Empty          | Treatment        | KW    | 0.796           | 0.677                                     | $\chi^2(1)=67.0$                   |
|                          | Stress           |       | 0.050           | 0.039                                     | $\chi^2(1)=3.838$                  |
| Avg Visit Time to Empty  | Treatment        | KW    | 0.405           | 0.007                                     | $\chi^2(1)=0.694$                  |
|                          | Stress           |       | 0.006           | 0.075                                     | $\chi^2(1)=7.471$                  |
| Social Pref Score        | Treatment        | KW    | 0.709           | 0.001                                     | $\chi^2(1)=0.139$                  |
|                          | Stress           |       | 0.670           | 0.002                                     | $\chi^2(1)=0.181$                  |

| Social Novelty             |                  | Females |                 |                                           |                                    |
|----------------------------|------------------|---------|-----------------|-------------------------------------------|------------------------------------|
|                            |                  | Test    | <i>p</i> -value | $\eta^2$ for ANOVA<br>$\epsilon^2$ for KW | F(df) for ANOVA $\chi^2$ for<br>KW |
| Distance Traveled          | Treatment        | ANOVA   | 0.247           | 0.015                                     | F(1,92)=1.360                      |
|                            | Stress           |         | 0.629           | 0.003                                     | F(1,92)=0.236                      |
|                            | Treatment:Stress |         | 0.906           | 0.000                                     | F(1,92)=0.014                      |
| Time in Center             | Treatment        | ANOVA   | 0.219           | 0.016                                     | F(1,92)=1.532                      |
|                            | Stress           |         | 0.113           | 0.027                                     | F(1,92)=2.561                      |
|                            | Treatment:Stress |         | 0.556           | 0.004                                     | F(1,92)=0.350                      |
| Time Near Familiar         | Treatment        | KW      | 0.883           | 0.009                                     | $\chi^2(1)=0.022$                  |
|                            | Stress           |         | 0.097           | 0.001                                     | $\chi^2(1)=2.753$                  |
| Avg Visit Time to Familiar | Treatment        | KW      | 0.161           | 0.002                                     | $\chi^2(1)=1.963$                  |
|                            | Stress           |         | 0.252           | 0.003                                     | $\chi^2(1)=1.310$                  |
| Time Near Novel            | Treatment        | KW      | 0.974           | 0.010                                     | $\chi^2(1)=0.001$                  |
|                            | Stress           |         | 0.196           | 0.002                                     | $\chi^2(1)=1.671$                  |
| Avg Visit Time to Novel    | Treatment        | KW      | 0.953           | 0.010                                     | $\chi^2(1)=0.003$                  |
|                            | Stress           |         | 0.019           | 0.000                                     | $\chi^2(1)=2.865$                  |
| Social Novelty Score       | Treatment        | ANOVA   | 0.331           | 0.010                                     | F(1,92)=0.956                      |
|                            | Stress           |         | 0.026           | 0.053                                     | F(1,92)=5.105                      |
|                            | Treatment:Stress |         | 0.098           | 0.029                                     | F(1,92)=2.791                      |

| Social Novelty             |                  | Males |                 |                                           |                                    |
|----------------------------|------------------|-------|-----------------|-------------------------------------------|------------------------------------|
|                            |                  | Test  | <i>p</i> -value | $\eta^2$ for ANOVA<br>$\epsilon^2$ for KW | F(df) for ANOVA $\chi^2$ for<br>KW |
| Distance Traveled          | Treatment        | ANOVA | 0.796           | 0.001                                     | F(1,96)=0.067                      |
|                            | Stress           |       | 0.582           | 0.003                                     | F(1,96)=0.305                      |
|                            | Treatment:Stress |       | 0.317           | 0.010                                     | F(1,96)=1.012                      |
| Time in Center             | Treatment        | KW    | 0.612           | 0.003                                     | $\chi^2(1)=0.257$                  |
|                            | Stress           |       | 0.917           | 0.000                                     | $\chi^2(1)=0.011$                  |
| Time Near Familiar         | Treatment        | KW    | 0.379           | 0.008                                     | $\chi^2(1)=0.774$                  |
|                            | Stress           |       | 0.198           | 0.017                                     | $\chi^2(1)=1.660$                  |
| Avg Visit Time to Familiar | Treatment        | KW    | 0.939           | 0.000                                     | $\chi^2(1)=0.006$                  |
|                            | Stress           |       | 0.557           | 0.003                                     | $\chi^2(1)=0.344$                  |
| Time Near Novel            | Treatment        | KW    | 0.769           | 0.001                                     | $\chi^2(1)=0.086$                  |

|                         |                  |       |       |       |                   |
|-------------------------|------------------|-------|-------|-------|-------------------|
| Avg Visit Time to Novel | Stress           | KW    | 0.161 | 0.020 | $\chi^2(1)=1.961$ |
|                         | Treatment        |       | 0.301 | 0.011 | $\chi^2(1)=1.071$ |
| Social Novelty Score    | Stress           | ANOVA | 0.579 | 0.003 | $\chi^2(1)=0.308$ |
|                         | Treatment        |       | 0.470 | 0.005 | $F(1,96)=0.527$   |
|                         | Stress           |       | 0.104 | 0.027 | $F(1,96)=2.696$   |
|                         | Treatment:Stress |       | 0.528 | 0.004 | $F(1,96)=0.401$   |

| Mate Preference           |                  | Females |                 |                                             |                                    |
|---------------------------|------------------|---------|-----------------|---------------------------------------------|------------------------------------|
|                           |                  | Test    | <i>p</i> -value | $\eta_p^2$ for ANOVA<br>$\epsilon^2$ for KW | F(df) for ANOVA $\chi^2$ for<br>KW |
| Distance                  | Treatment        | ANOVA   | 0.003           | 0.092                                       | $F(1,94)=9.542$                    |
|                           | Stress           |         | 0.170           | 0.020                                       | $F(1,94)=1.911$                    |
|                           | Treatment:Stress |         | 0.083           | 0.032                                       | $F(1,94)=3.066$                    |
| Time Near Hormone         | Treatment        | ANOVA   | 0.049           | 0.041                                       | $F(1,94)=3.964$                    |
|                           | Stress           |         | 0.674           | 0.002                                       | $F(1,94)=0.179$                    |
|                           | Treatment:Stress |         | 0.291           | 0.012                                       | $F(1,94)=1.130$                    |
| Time Near NH              | Treatment        | ANOVA   | 0.629           | 0.003                                       | $F(1,94)=0.235$                    |
|                           | Stress           |         | 0.066           | 0.036                                       | $F(1,94)=3.463$                    |
|                           | Treatment:Stress |         | 0.276           | 0.013                                       | $F(1,94)=1.20$                     |
| Stim Explore Time Hormone | Treatment        | KW      | 0.036           | 0.045                                       | $\chi^2(1)=4.410$                  |
|                           | Stress           |         | 0.362           | 0.009                                       | $\chi^2(1)=0.830$                  |
| Nose Touch Number Hormone | Treatment        | KW      | 0.672           | 0.002                                       | $\chi^2(1)=0.180$                  |
|                           | Stress           |         | 0.057           | 0.037                                       | $\chi^2(1)=3.637$                  |
| Nose Touch Time Hormone   | Treatment        | KW      | 0.722           | 0.001                                       | $\chi^2(1)=0.127$                  |
|                           | Stress           |         | 0.070           | 0.034                                       | $\chi^2(1)=3.294$                  |
| Stim Explore Time NH      | Treatment        | KW      | 0.409           | 0.007                                       | $\chi^2(1)=0.682$                  |
|                           | Stress           |         | 0.266           | 0.013                                       | $\chi^2(1)=1.238$                  |
| Nose Touch Number NH      | Treatment        | KW      | 0.926           | 0.000                                       | $\chi^2(1)=0.009$                  |
|                           | Stress           |         | 0.090           | 0.030                                       | $\chi^2(1)=2.879$                  |
| Nose Touch Time NH        | Treatment        | KW      | 0.822           | 0.001                                       | $\chi^2(1)=0.050$                  |
|                           | Stress           |         | 0.126           | 0.024                                       | $\chi^2(1)=2.336$                  |
| Time Near Both Rats       | Treatment        | ANOVA   | 0.025           | 0.053                                       | $F(1,94)=5.216$                    |
|                           | Stress           |         | 0.500           | 0.005                                       | $F(1,94)=0.459$                    |
|                           | Treatment:Stress |         | 0.677           | 0.002                                       | $F(1,94)=0.175$                    |
| Mate Pref Score           | Treatment        | ANOVA   | 0.438           | 0.006                                       | $F(1,94)=0.605$                    |
|                           | Stress           |         | 0.154           | 0.022                                       | $F(1,94)=2.069$                    |
|                           | Treatment:Stress |         | 0.170           | 0.020                                       | $F(1,94)=1.908$                    |
| Mate Preference           |                  | Males   |                 |                                             |                                    |
|                           |                  | Test    | <i>p</i> -value | $\eta_p^2$ for ANOVA<br>$\epsilon^2$ for KW | F(df) for ANOVA $\chi^2$ for<br>KW |
| Distance                  | Treatment        | KW      | 0.081           | 0.031                                       | $\chi^2(1)=3.052$                  |
|                           | Stress           |         | 0.763           | 0.001                                       | $\chi^2(1)=0.091$                  |
| Time Near Hormone         | Treatment        | ANOVA   | 0.738           | 0.001                                       | $F(1,95)=0.113$                    |
|                           | Stress           |         | 0.098           | 0.029                                       | $F(1,95)=2.802$                    |
|                           | Treatment:Stress |         | 0.553           | 0.004                                       | $F(1,95)=0.354$                    |
| Time Near NH              | Treatment        | KW      | 0.307           | 0.011                                       | $\chi^2(1)=1.054$                  |
|                           | Stress           |         | 0.591           | 0.003                                       | $\chi^2(1)=0.290$                  |
| Stim Explore Time Hormone | Treatment        | ANOVA   | 0.989           | 0.000                                       | $F(1,95)=0.000$                    |
|                           | Stress           |         | 0.011           | 0.067                                       | $F(1,95)=6.764$                    |
|                           | Treatment:Stress |         | 0.606           | 0.003                                       | $F(1,95)=0.269$                    |
| Nose Touch Number Hormone | Treatment        | KW      | 0.441           | 0.006                                       | $\chi^2(1)=0.594$                  |
|                           | Stress           |         | 0.039           | 0.044                                       | $\chi^2(1)=4.266$                  |
| Nose Touch Time Hormone   | Treatment        | KW      | 0.355           | 0.009                                       | $\chi^2(1)=0.854$                  |

|                      |                  |       |       |       |                   |
|----------------------|------------------|-------|-------|-------|-------------------|
| Stim Explore Time NH | Stress           | KW    | 0.010 | 0.069 | $\chi^2(1)=6.715$ |
|                      | Treatment        |       | 0.092 | 0.029 | $\chi^2(1)=2.835$ |
| Nose Touch Number NH | Stress           | KW    | 0.492 | 0.005 | $\chi^2(1)=0.472$ |
|                      | Treatment        |       | 0.466 | 0.005 | $\chi^2(1)=0.532$ |
| Nose Touch Time NH   | Stress           | KW    | 0.058 | 0.037 | $\chi^2(1)=3.600$ |
|                      | Treatment        |       | 0.964 | 0.000 | $\chi^2(1)=0.002$ |
| Time Near Both Rats  | Stress           | ANOVA | 0.032 | 0.047 | $\chi^2(1)=4.605$ |
|                      | Treatment        |       | 0.758 | 0.001 | $F(1,94)=0.095$   |
| Mate Pref Score      | Stress           | ANOVA | 0.072 | 0.034 | $F(1,94)=3.307$   |
|                      | Treatment:Stress |       | 0.855 | 0.000 | $F(1,94)=0.034$   |
|                      | Treatment        |       | 0.461 | 0.006 | $F(1,94)=0.548$   |
|                      | Stress           |       | 0.343 | 0.009 | $F(1,94)=0.909$   |
|                      | Treatment:Stress |       | 0.300 | 0.011 | $F(1,94)=1.084$   |

| Gene Expression |                  | Females |                 |                                           |                                    |
|-----------------|------------------|---------|-----------------|-------------------------------------------|------------------------------------|
|                 |                  | Test    | <i>p</i> -value | $\eta^2$ for ANOVA<br>$\epsilon^2$ for KW | F(df) for ANOVA $\chi^2$ for<br>KW |
| MeA <i>Ar</i>   | Treatment        | ANOVA   | 0.760           | 0.003                                     | $F(1, 43) = 0.094$                 |
|                 | Stress           |         | 0.474           | 0.016                                     | $F(1, 43) = 0.521$                 |
|                 | Treatment:Stress |         | 0.793           | 0.002                                     | $F(1, 43) = 0.067$                 |
| MeA <i>Esr2</i> | Treatment        | ANOVA   | 0.624           | 0.050                                     | $F(1, 43) = 0.244$                 |
|                 | Stress           |         | 0.775           | 0.017                                     | $F(1, 43) = 0.086$                 |
|                 | Treatment:Stress |         | 0.854           | 0.007                                     | $F(1, 43) = 0.034$                 |
| PVN <i>Ar</i>   | Treatment        | ANOVA   | 0.436           | 0.031                                     | $F(1, 42) = 0.620$                 |
|                 | Stress           |         | 0.144           | 0.110                                     | $F(1, 42) = 2.212$                 |
|                 | Treatment:Stress |         | 0.020           | 0.290                                     | $F(1, 42) = 5.811$                 |
| PVN <i>Esr2</i> | Treatment        | ANOVA   | 0.616           | 0.034                                     | $F(1, 42) = 0.256$                 |
|                 | Stress           |         | 0.991           | 0.000                                     | $F(1, 42) = 0.000$                 |
|                 | Treatment:Stress |         | 0.290           | 0.155                                     | $F(1, 42) = 1.151$                 |

| Gene Expression |                  | Males |                 |                                           |                                    |
|-----------------|------------------|-------|-----------------|-------------------------------------------|------------------------------------|
|                 |                  | Test  | <i>p</i> -value | $\eta^2$ for ANOVA<br>$\epsilon^2$ for KW | F(df) for ANOVA $\chi^2$ for<br>KW |
| MeA <i>Ar</i>   | Treatment        | ANOVA | 0.815           | 0.001                                     | $F(1, 43) = 0.055$                 |
|                 | Stress           |       | 0.114           | 0.054                                     | $F(1, 43) = 2.598$                 |
|                 | Treatment:Stress |       | 0.027           | 0.109                                     | $F(1, 43) = 5.267$                 |
| MeA <i>Esr2</i> | Treatment        | ANOVA | 0.012           | 1.247                                     | $F(1, 44) = 6.848$                 |
|                 | Stress           |       | 0.657           | 0.037                                     | $F(1, 44) = 0.201$                 |
|                 | Treatment:Stress |       | 0.357           | 0.158                                     | $F(1, 44) = 0.867$                 |
| PVN <i>Ar</i>   | Treatment        | ANOVA | 0.054           | 0.340                                     | $F(1, 44) = 3.938$                 |
|                 | Stress           |       | 0.158           | 0.179                                     | $F(1, 44) = 2.067$                 |
|                 | Treatment:Stress |       | 0.167           | 0.170                                     | $F(1, 44) = 1.972$                 |
| PVN <i>Esr2</i> | Treatment        | ANOVA | 0.319           | 0.179                                     | $F(1, 44) = 1.015$                 |
|                 | Stress           |       | 0.515           | 0.076                                     | $F(1, 44) = 0.432$                 |
|                 | Treatment:Stress |       | 0.340           | 0.164                                     | $F(1, 44) = 0.932$                 |

Note: P, postnatal day; NH, no hormone treatment; PVN, paraventricular nucleus; MeA, medial amygdala; AGI, anogenital index; Avg, average; KW, Kruskal-Wallis test.
